# Supplementary material for: Tuning ceria catalysts in aqueous media at the nanoscale: how do surface charge and surface defects determine peroxidase- and haloperoxidase-like reactivity
Source: Royal Society of Chemistry journal article supplement (doi:10.1039/d2nr03172h), 2022-01-01
Supplement: d2nr03172h1.pdf [file d2nr03172h1.pdf]

## SUPPORTING INFORMATION

### Tuning Ceria Catalysts in Aqueous Media at the Nanoscale: How Do Surface Charge and Area Determine Peroxidase- and Haloperoxidase-Like Reactivity

Eva Pütz,<sup>1</sup> Glen J. Smales,<sup>2</sup> Olga Jegel<sup>1</sup>, Franziska Emmerling,<sup>2</sup> Wolfgang Tremel<sup>1\*</sup>

<sup>1</sup>Johannes Gutenberg-Universität Mainz, Department Chemie, Duesbergweg 10-14, D-55128 Mainz, Germany

<sup>2</sup>Bundesanstalt für Materialforschung und -prüfung (BAM), Unter den Eichen 87, Berlin 12205, Germany

#### Table of Contents

| Figure  | Content                                                                               | page |
|---------|---------------------------------------------------------------------------------------|------|
| Fig. S1 | X-ray powder diffraction pattern of $\text{Ce}(\text{C}_2\text{O}_4)(\text{HCO}_2)$ . | S2   |
| Fig. S2 | SAXS data                                                                             | S3   |
| Fig. S3 | SAXS average size distributions                                                       | S4   |
| Fig. S4 | SAXS radial histograms and cumulative abundance                                       | S5   |
| Fig. S5 | Digital images of the reaction solutions after 2.0 h, 2.5 h, 3.0 h and 3.5 h          | S6   |
| Fig. S6 | Scanning electron microscopy images of mesoporous $\text{CeO}_2$ nanoparticles.       | S7   |

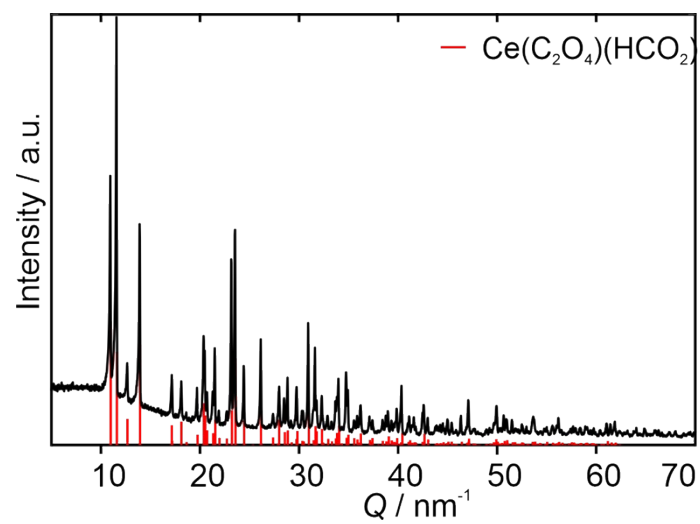

**Fig. S1.** X-ray powder diffraction pattern of Ce(C<sub>2</sub>O<sub>4</sub>)(HCO<sub>2</sub>) formed after 120 h in a flask reaction. Red ticks indicate the calculated reflection positions for Ce(C<sub>2</sub>O<sub>4</sub>)(HCO<sub>2</sub>) based on structural data from the ICSD data bank (ICSD# 43450).

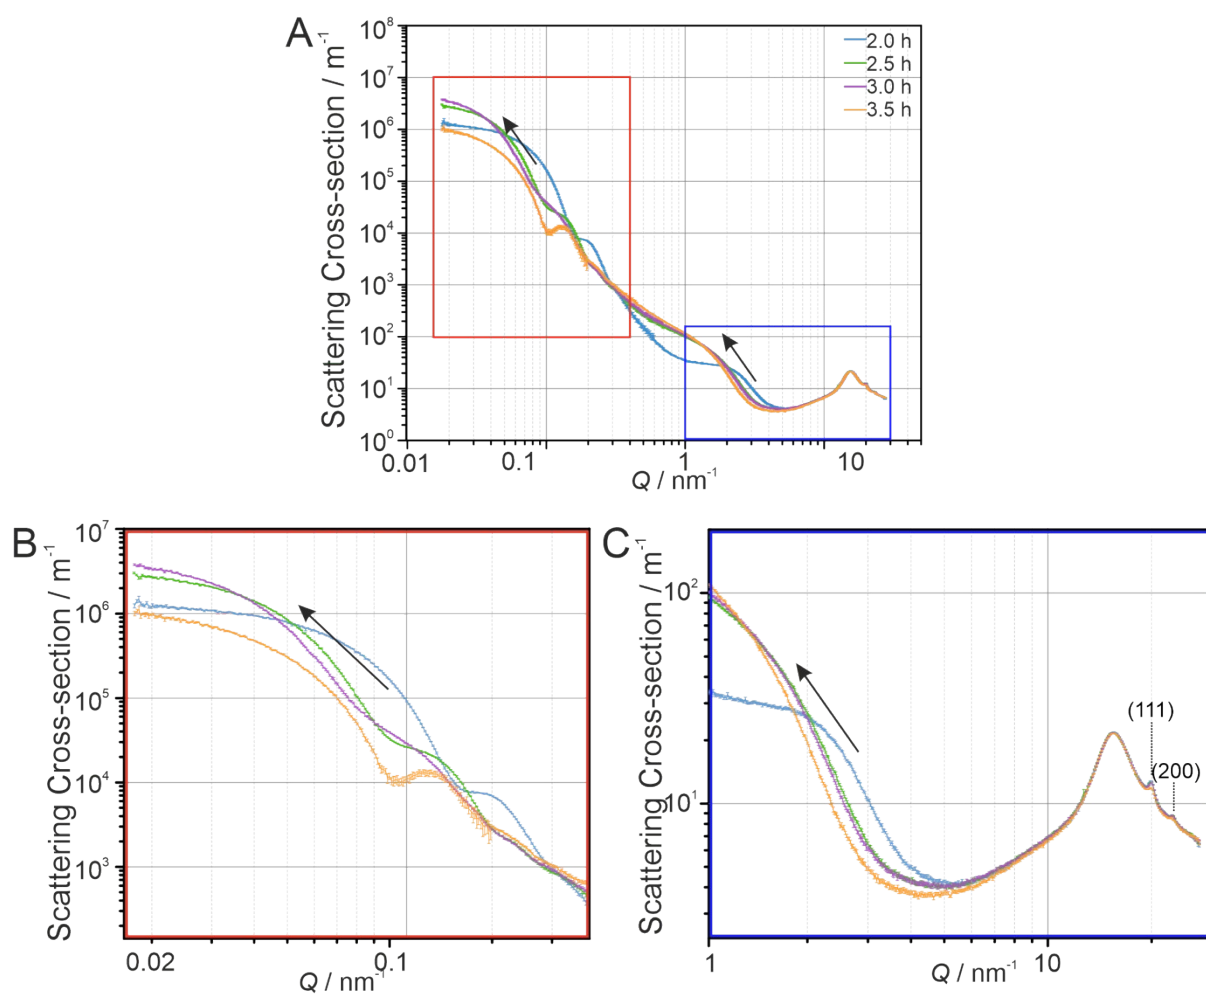

**Fig. S2.** SAXS measurements (A) of mesoporous  $\text{CeO}_{2-x}$  nanoparticles formed after 2.0 h, 2.5 h, 3.0 h and 3.5 h of reaction time, with (B) and (C) showing the red and blue regions marked in (A) in more detail. Arrows are a guide for the eye to show the shift to larger values of  $q$  for 2.0 h, 2.5 h and 3.0 h samples.

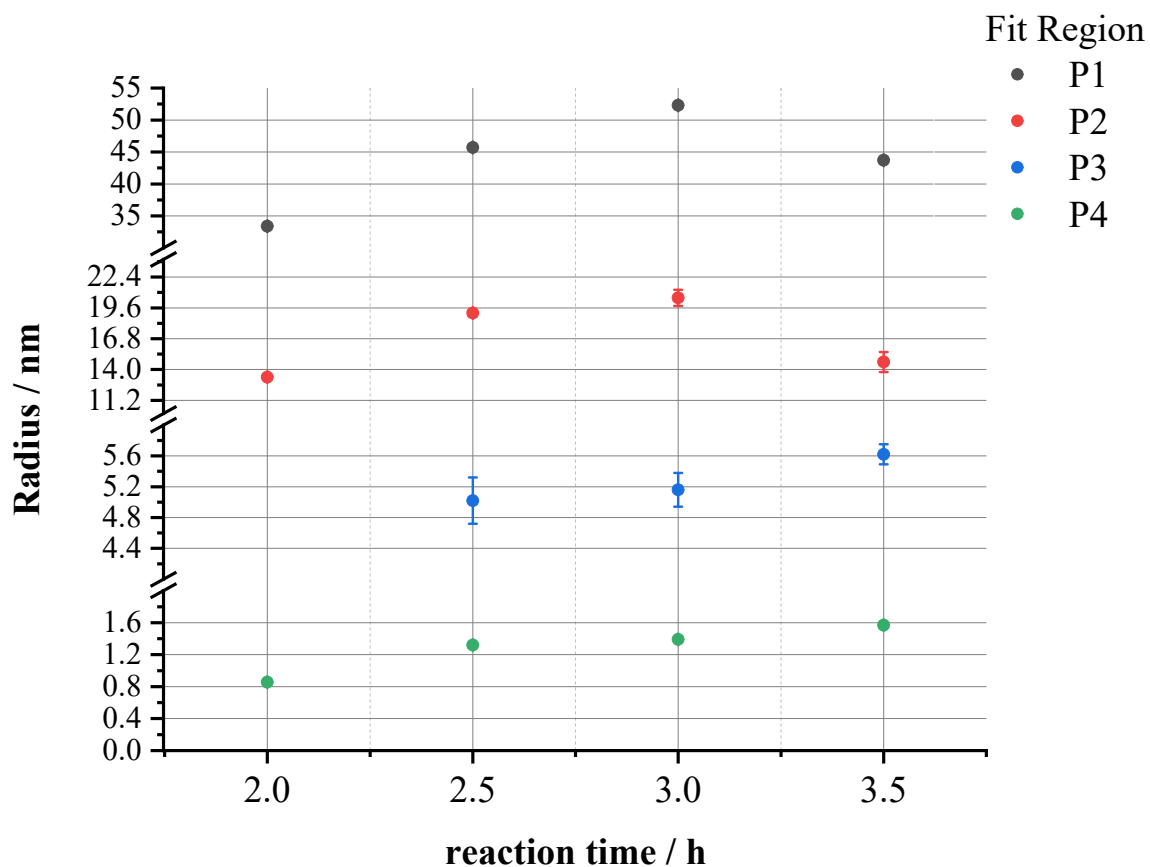

**Fig. S3.** Average radial dimension of the four populations observed from fits of the SAXS for mesoporous  $\text{CeO}_{2-x}$  nanoparticles formed at different reaction times. Fit regions refer to the population distributions and are set to the ranges of (*P1*) 0.5 – 2.5 nm, (*P2*) 2.5 – 10 nm, (*P3*) 10 – 30 nm and (*P4*) 30 – 100 nm, though for 2.0 h reaction times regions *P3* and *P4* are set between 10 – 20 nm and 20 – 100 nm respectively.

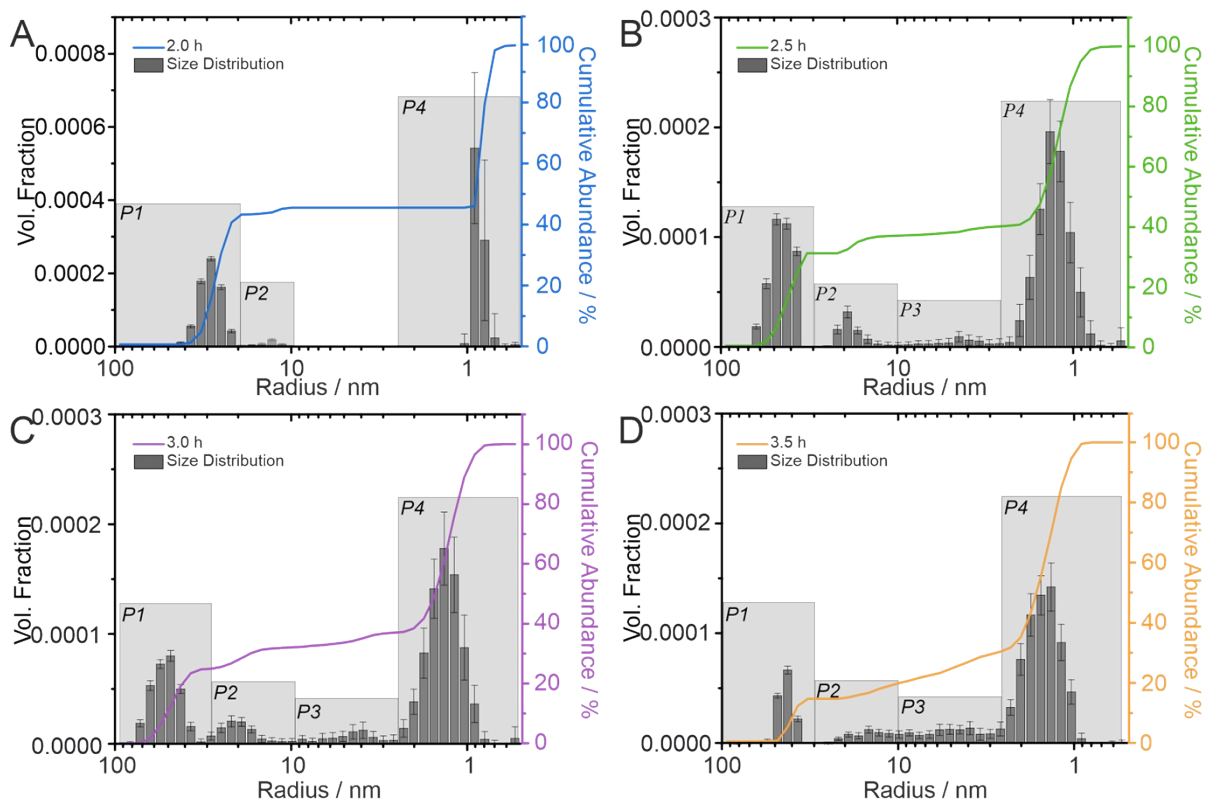

**Fig. S4.** Particle radial histograms derived from small angle X-ray scattering data with cumulative abundance (right y-axis) for mesoporous  $\text{CeO}_{2-x}$  nanoparticles formed after (A) 2.0 h, (B) 2.5 h, (C) 3.0 h and (D) 3.5 h of reaction time.

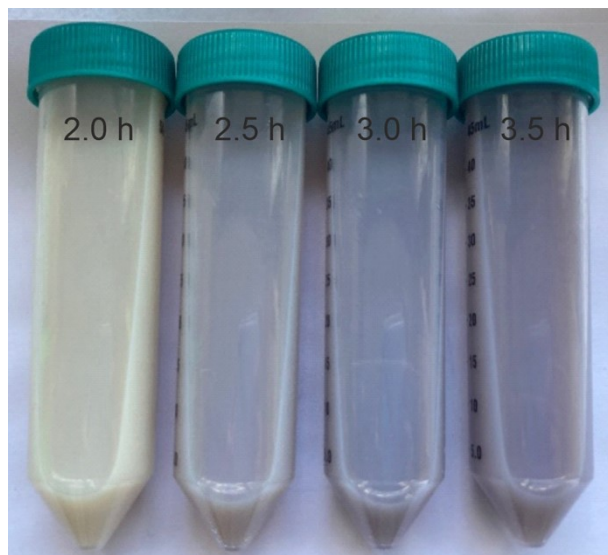

**Fig. S5.** Digital images of the reaction solutions after 2.0 h, 2.5 h, 3.0 h and 3.5 h.

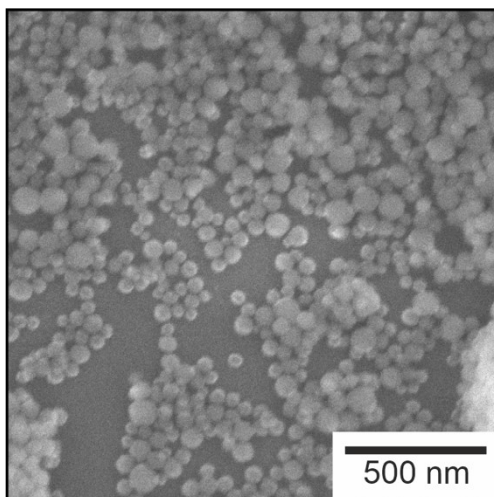

**Fig. S6.** Scanning electron microscopy images of mesoporous CeO<sub>2</sub> nanoparticles formed after 2.0 h.
